# Supplementary material for: MicroRNA Expression Is Required for Pancreatic Islet Cell Genesis in the Mouse
Source: Oxford University Press journal article supplement (doi:10.2337/db07-0175), 2007-09-06
Supplement: db070175onlineappentabl2.doc [file db070175onlineappentabl2.doc]

**Supplementary Table 2: Novel miRNAs cloned from e14.5 mouse pancreas.**

| **miRNA** | **Sequence** | **x cloned** | **Mouse Genome Location** | **Strand** |  | **Rat** | **Dog** | **Human** |
| --- | --- | --- | --- | --- | --- | --- | --- | --- |
| btc 325 | TGAGAGGCAGAGAGCGAGACTTT | 1 | chr11:76,894,317-76,894,339 | - |  | + | + | + |
| 14.5 486 | GAGGGTTGGGTGGAGGCTCTCCG | 1 | chr2:173,909,997-173,910,018 | - |  | + | + | + |
| 14.5 438 | GCACTGAGATGGGAGTGGTGTAA | 1 | chr2:116,876,592-116,876,614 | + |  | + | - | - |
| 14.5 307 | TGACACCTGCCACCCAGCCCAAGT | 1 | chr12:110,167,868-110,167,890 | + |  | + | - | - |
| 14.5 388 | GATGAGAGCGCGGTACTGATGGC | 1 | chr7:130,338,153-130,338,175 | + |  | + | + | + |
| 14.5 2 427 | GCACTGAGATGGGAGTGGTGT | 1 | chr2:116,876,592-116,876,612 | + |  | + | - | - |
| 14.5 2 425 | CTCACCTGGAGCATGTTTTC | 2 | chr13:21,904,396-21,904,415 | - |  | + | - | - |
| 14.5 2 380 | GCCCTAAGGTGAATTTTTTGGG | 1 | chr3:157,479,617-157,479,638 | + |  | + | + | + |
| 14.5 2 27 | GGTGGTGCAGGCAGGAGAGCCA | 1 | chr7:100,756,453-100,756,474 | - |  | + | - | - |
| 14.5 2 250 | TATCGTCCTTCTGCCCAGCGAT | 1 | chr3:96,549,354-96,549,375 | - |  | + | - | - |
| 14.5 2 222 | TGCCCCCTCCAGGAAGCCTTCT | 1 | chr12:110,195,735-110,195,756 | + |  | + | - | + |
| 14.5 2 192 | AAGACGGGAGAAGAGAAGGGAG | 2 | chr7:142,464,358-142,464,379 | - |  | + | + | + |
| 14.5 2 155 | ACGGAGAGTCTTTGTCACTCAGT | 1 | chr16:93,258,315-93,258,337 | + |  | + | + | + |
| 14.5 2 135 | ACTAGATTGTGAGCTGCTGGAGT | 1 | chr16:24,743,258-24,743,279 | + |  | + | + | + |
| 14.5 454 | CACAGCTCCCATCTCAGAACAA | 1 | chr2:116,876,627-116,876,648 | + |  | + | - | - |
| 14.5 142 | AAGGTTACTTGTTAGTTCAGGA | 2 | chr4:94,157,185-94,157,206 | + |  | + | + | - |
| 14.5 99 | TCAGTAACAAAGATTCATCCTTGA | 1 | chr16:93,258,277-93,258,299 | + |  | + | + | + |
| 14.5 91 | TGCAGTCCACGGGCATATACAC | 1 | chr4:62,743,264-62,743,285 | + |  | + | + | + |
